# Supplementary material for: Using alternative SMILES representations to identify novel functional analogues in chemical similarity vector searches
Source: PubMed Central journal article supplement (PMC10724362; doi:10.1016/j.patter.2023.100865), 2023-10-30
Supplement: mmc1.pdf [file mmc1.pdf]

**Patterns, Volume 4**

**Supplemental information**

**Using alternative SMILES representations  
to identify novel functional analogues  
in chemical similarity vector searches**

**Clayton W. Kosonocky, Aaron L. Feller, Claus O. Wilke, and Andrew D. Ellington**

**Table S1. Different canonical SMILES string representations for each query molecule.**

| Query               | Canon Alg.   | SMILES                                                                               |
|---------------------|--------------|--------------------------------------------------------------------------------------|
| Zidovudine          | RDKit Atom 0 | <chem>Cc1cn(C2CC(N=[N+]=[N-])C(CO)O2)c(=O)[nH]c1=O</chem>                            |
|                     | RDKit Atom n | <chem>O=c1[nH]c(=O)c(C)cn1C1CC(N=[N+]=[N-])C(CO)O1</chem>                            |
|                     | OEChem       | <chem>CC1=CN(C(=O)NC1=O)C2CC(C(O2)CO)N=[N+]=[N-]</chem>                              |
| Penicillin          | RDKit Atom 0 | <chem>CC1(C)SC2C(NC(=O)Cc3ccccc3)C(=O)N2C1C(=O)O</chem>                              |
|                     | RDKit Atom n | <chem>c1ccc(CC(=O)NC2C(=O)N3C2SC(C)(C)C3C(=O)O)cc1</chem>                            |
|                     | OEChem       | <chem>CC1(C(N2C(S1)C(C2=O)NC(=O)CC3=CC=CC=C3)C(=O)O)C</chem>                         |
| Nirmatrelvir        | RDKit Atom 0 | <chem>CC(C)(C)C(NC(=O)C(F)(F)F)C(=O)N1CC2C(C1C(=O)NC(C#N)CC1CCNC1=O)C2(C)C</chem>    |
|                     | RDKit Atom n | <chem>N(C(=O)C1C2C(CN1C(=O)C(NC(=O)C(F)(F)F)C(C)(C)C)C2(C)C)C(C#N)CC1CCNC1=O</chem>  |
|                     | OEChem       | <chem>CC1(C2C1C(N(C2)C(=O)C(C(C)(C)C)NC(=O)C(F)(F)F)C(=O)NC(CC3CCNC3=O)C#N)C</chem>  |
| LSD                 | RDKit Atom 0 | <chem>CCN(CC)C(=O)C1C=C2c3cccc4[nH]cc(c34)CC2N(C)C1</chem>                           |
|                     | RDKit Atom n | <chem>c1ccc2[nH]cc3c2c1C1=CC(C(=O)N(CC)CC)CN(C)C1C3</chem>                           |
|                     | OEChem       | <chem>CCN(CC)C(=O)C1CN(C2CC3=CNC4=CC=CC(=C34)C2=C1)C</chem>                          |
| Fentanyl            | RDKit Atom 0 | <chem>CCC(=O)N(c1ccccc1)C1CCN(CCC2ccccc2)CC1</chem>                                  |
|                     | RDKit Atom n | <chem>c1(CCN2CCC(N(C(=O)CC)c3ccccc3)CC2)ccccc1</chem>                                |
|                     | OEChem       | <chem>CCC(=O)N(C1CCN(CC1)CCC2=CC=CC=C2)C3=CC=CC=C3</chem>                            |
| SB-759335-B         | RDKit Atom 0 | <chem>CCn1c(-c2nonc2N)nc2cncc(C(=O)N3CCNCC3)c21</chem>                               |
|                     | RDKit Atom n | <chem>c1ncc2nc(-c3nonc3N)n(CC)c2c1C(=O)N1CCNCC1</chem>                               |
|                     | OEChem       | <chem>CCN1C2=C(C=NC=C2C(=O)N3CCNCC3)N=C1C4=NON=C4N</chem>                            |
| BMS-536924          | RDKit Atom 0 | <chem>Cc1cc(N2CCOCC2)cc2[nH]c(-c3c(NCC(O)c4cccc(Cl)c4)cc[nH]c3=O)nc12</chem>         |
|                     | RDKit Atom n | <chem>C(Nc1cc[nH]c(=O)c1-c1nc2c(C)cc(N3CCOCC3)cc2[nH]1)C(O)c1cccc(Cl)c1</chem>       |
|                     | OEChem       | <chem>CC1=CC(=CC2=C1N=C(N2)C3=C(C=CNC3=O)NCC(C4=CC(=CC=C4)Cl)O)N5CCOCC5</chem>       |
| 558441-90-0         | RDKit Atom 0 | <chem>NCCCCN(Cc1nc2ccccc2[nH]1)C1CCCc2ccnc21</chem>                                  |
|                     | RDKit Atom n | <chem>c1cccc2[nH]c(CN(CCCCN)C3CCCc4ccnc43)nc12</chem>                                |
|                     | OEChem       | <chem>C1CC(C2=C(C1)C=CC=N2)N(CCCCN)CC3=NC4=CC=CC=C4N3</chem>                         |
| Fluticasone furoate | RDKit Atom 0 | <chem>CC1CC2C3CC(F)C4=CC(=O)C=CC4(C)C3(F)C(O)CC2(C)C1(OC(=O)c1ccco1)C(=O)SCF</chem>  |
|                     | RDKit Atom n | <chem>o1cccc1C(=O)OC1(C(=O)SCF)C(C)CC2C3CC(F)C4=CC(=O)C=CC4(C)C3(F)C(O)CC21C</chem>  |
|                     | OEChem       | <chem>CC1CC2C3CC(C4=CC(=O)C=CC4(C3(C(C2(C1(C(=O)SCF)OC(=O)C5=CC=CO5)C)O)F)C)F</chem> |

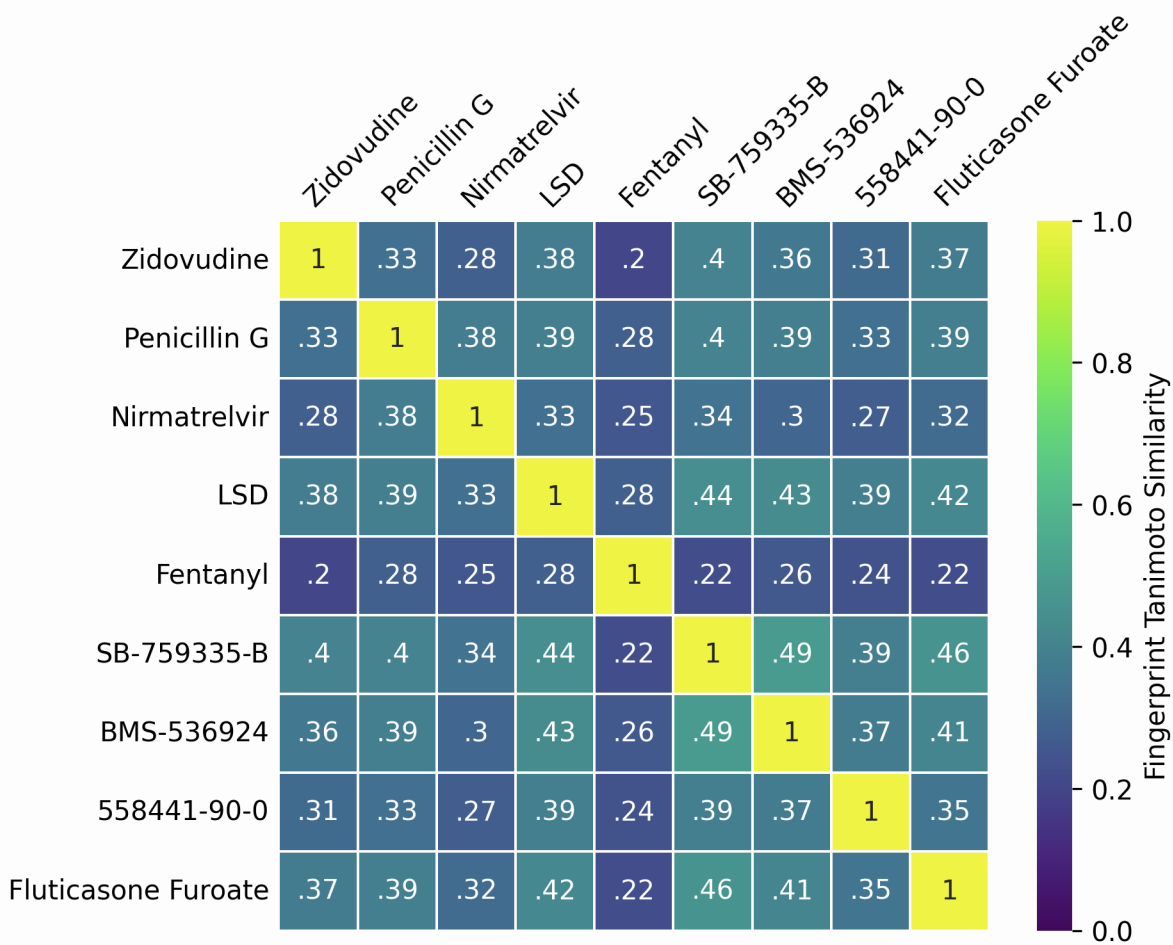

**Figure S1: Fingerprint Tanimoto coefficients between each of the query molecules.**

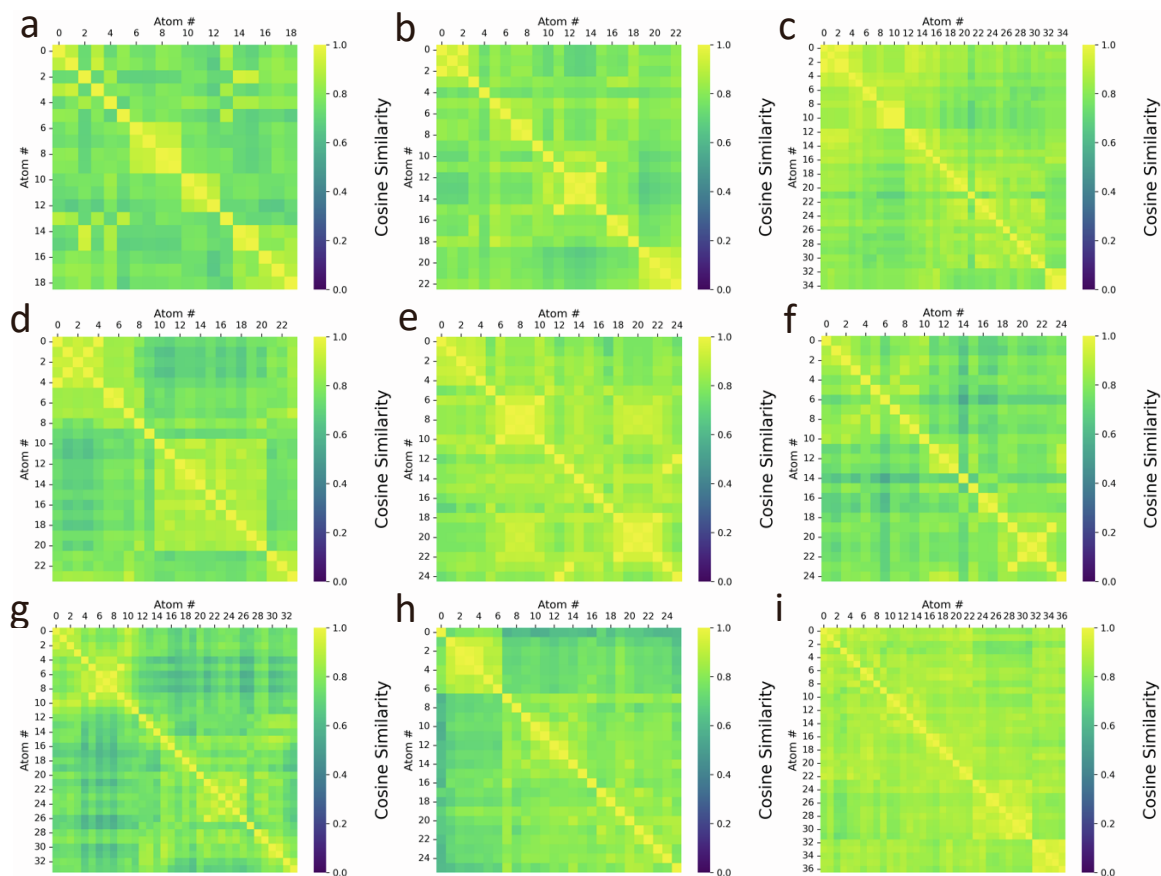

**Figure S2: Feature cosine similarity of each RDKit canonicalized query depending on the chosen root atom number. (a-h).** In order: zidovudine, penicillin, nirmatrelvir, LSD, fentanyl, SB-759335-B, BMS-536924, 558441-90-0, fluticasone furoate. The canonicalized variant with the lowest feature cosine similarity to the Atom 0 representation was chosen as the “RDKit Atom n” query. The root atoms providing most dissimilar feature vectors were 15 for zidovudine, 13 for penicillin, 21 for nirmatrelvir, 11 for LSD, 17 for fentanyl, 14 for SB-759335-B, 17 for BMS-536924, 10 for 558441-90-0, and 31 for fluticasone furoate.

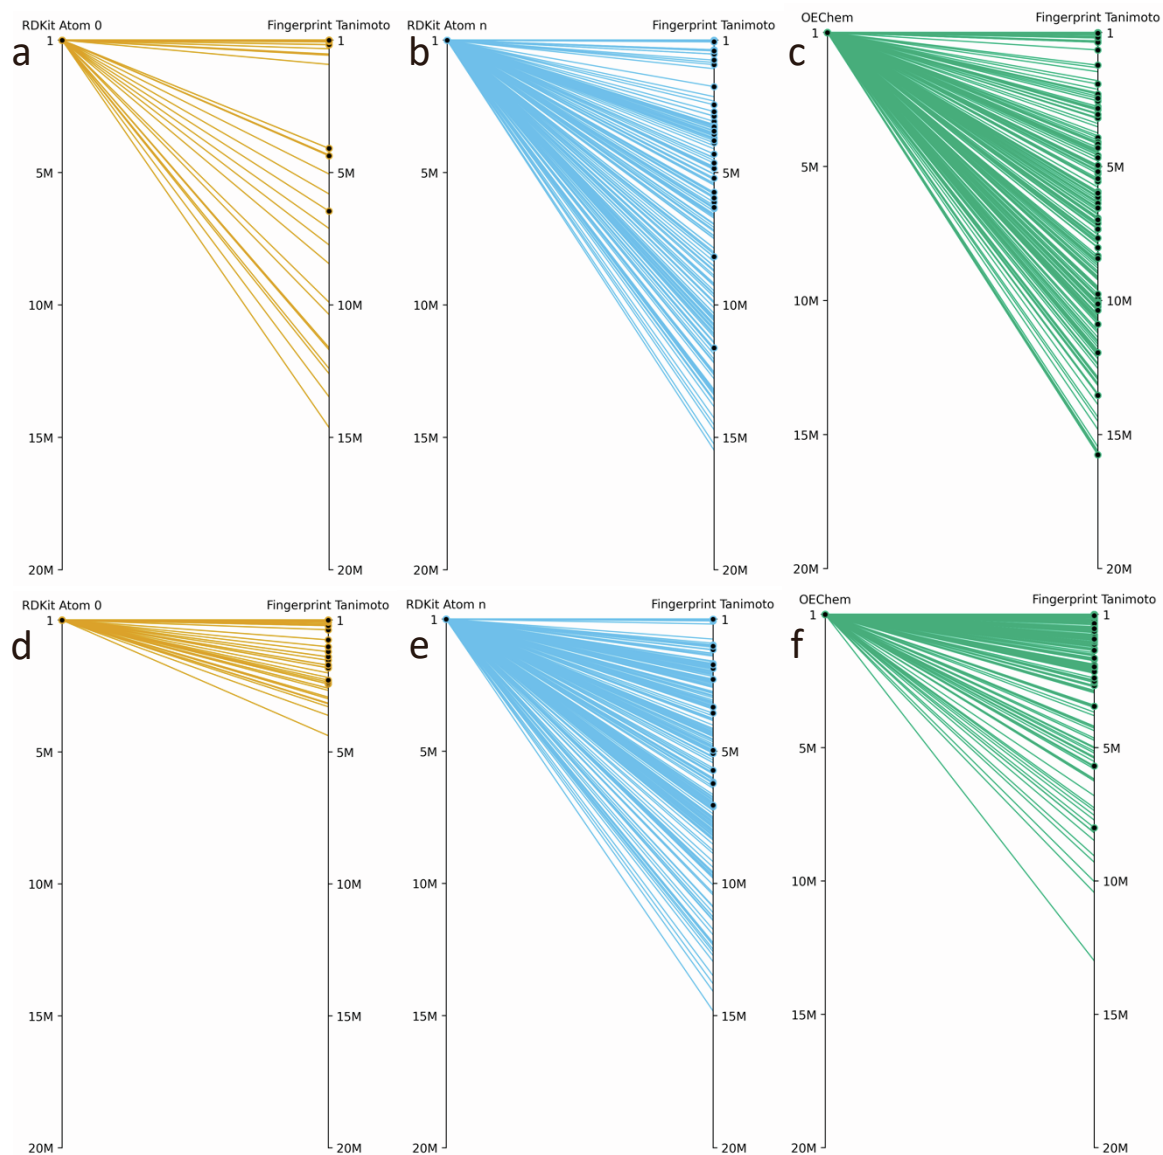

**Figure S3. The index rank of each canonicalization's top 250 results for zidovudine and penicillin compared to the index rank that these same molecules scored in a fingerprint Tanimoto search. Black dot indicates molecules functionally similar to the query, as determined by the GPT-assisted patent search. (a-c) Zidovudine. (d-f) Penicillin.**

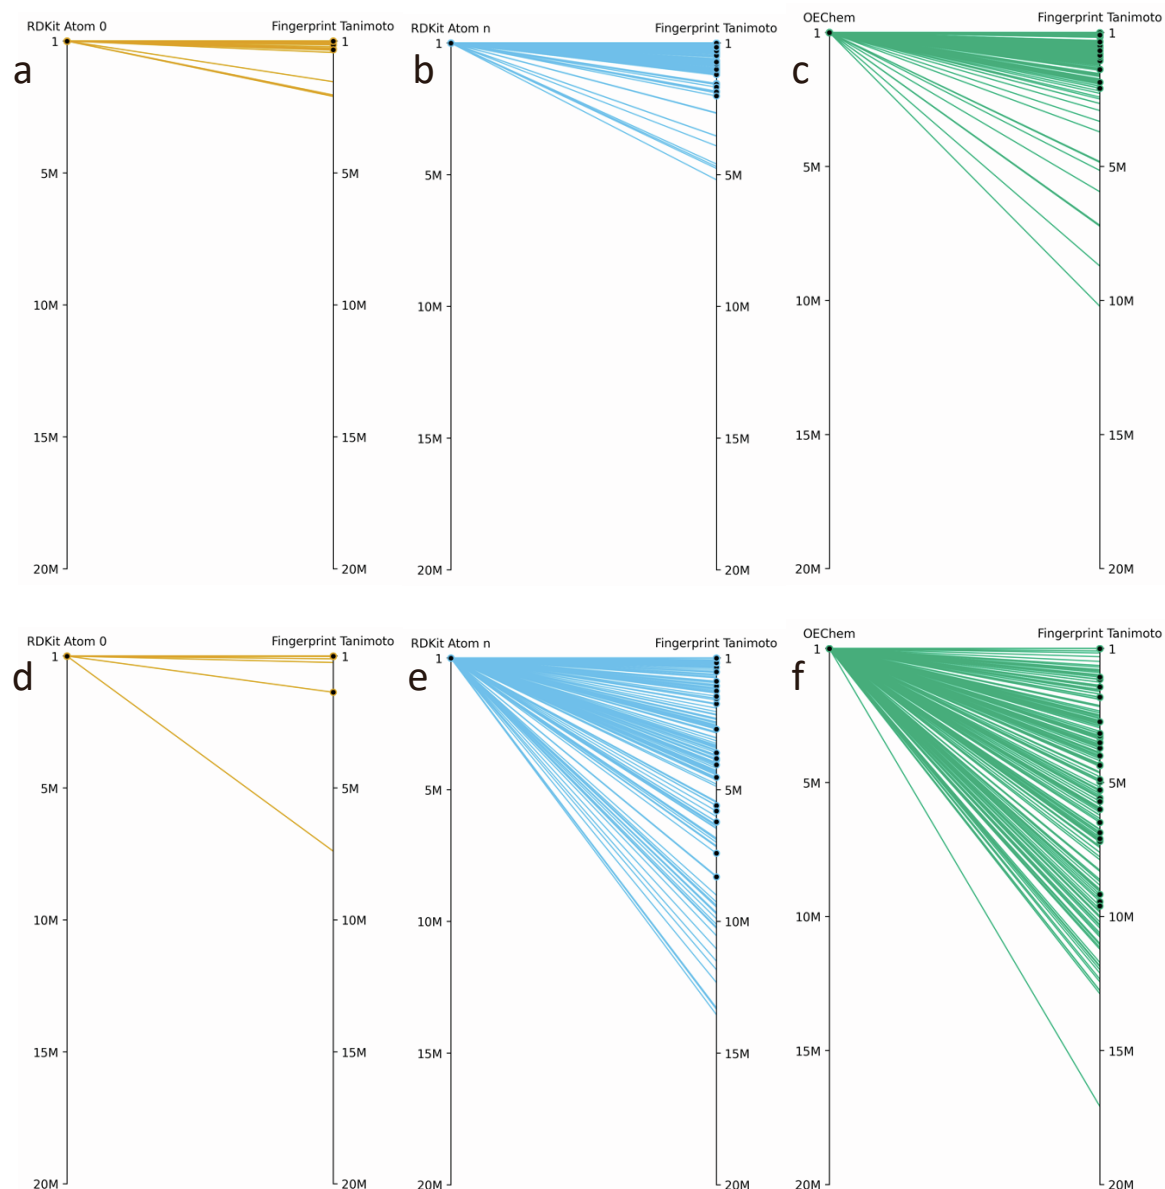

**Figure S4.** The index rank of each canonicalization's top 250 results for nirmatrelvir and LSD compared to the index rank that these same molecules scored in a fingerprint Tanimoto search. Black dot indicates molecules functionally similar to the query, as determined by the GPT-assisted patent search. **(a-c)** Nirmatrelvir. **(d-f)** LSD.

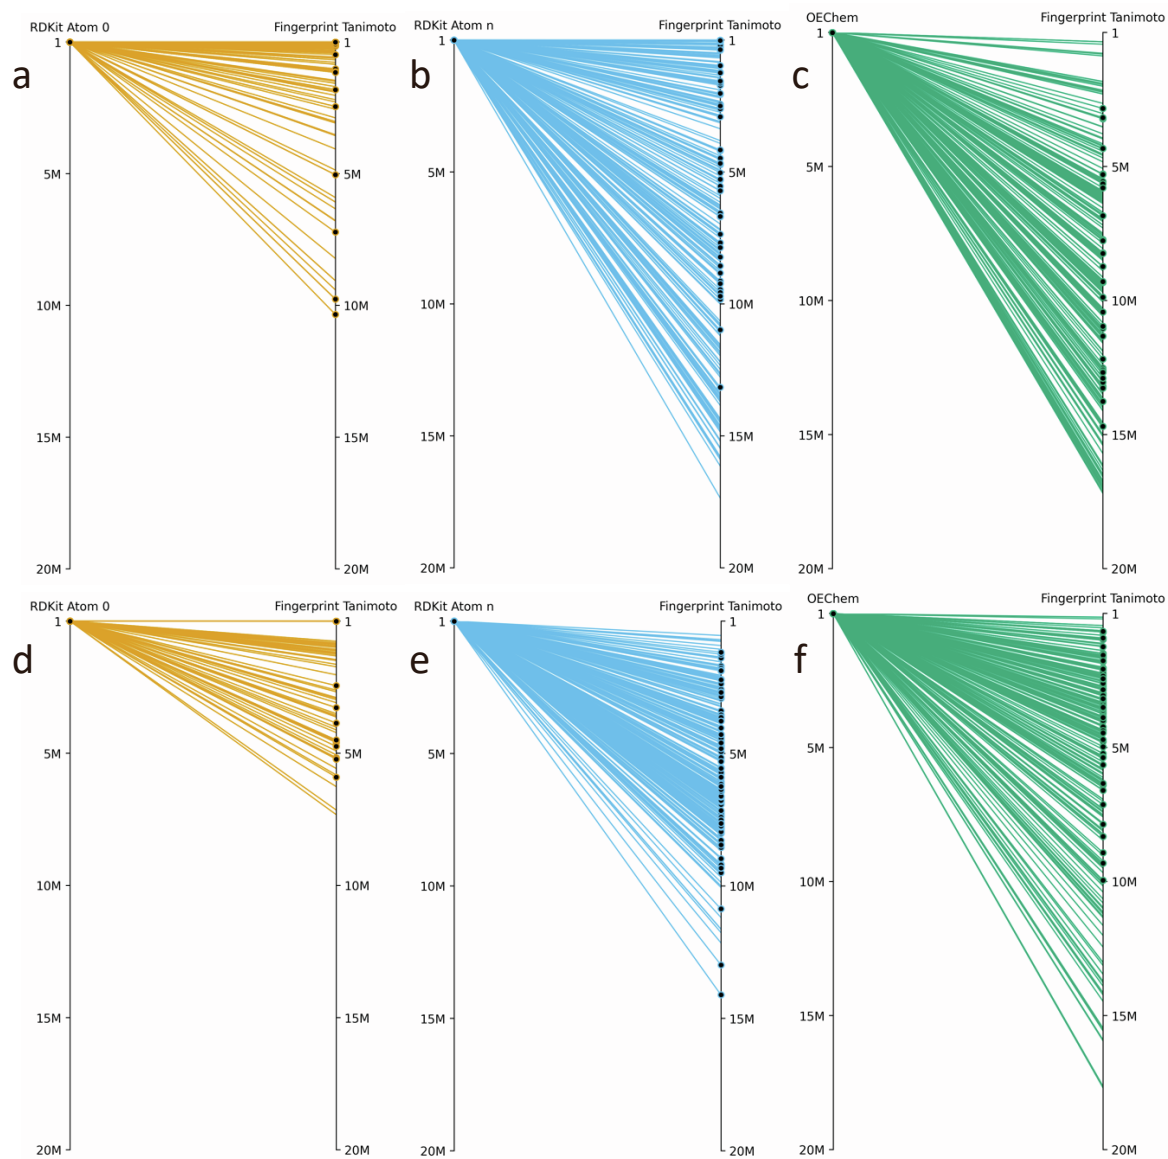

**Figure S5. The index rank of each canonicalization's top 250 results for fentanyl and SB-759335-B compared to the index rank that these same molecules scored in a fingerprint Tanimoto search. Black dot indicates molecules functionally similar to the query, as determined by the GPT-assisted patent search. (a-c) Fentanyl. (d-f) SB-759335-B.**

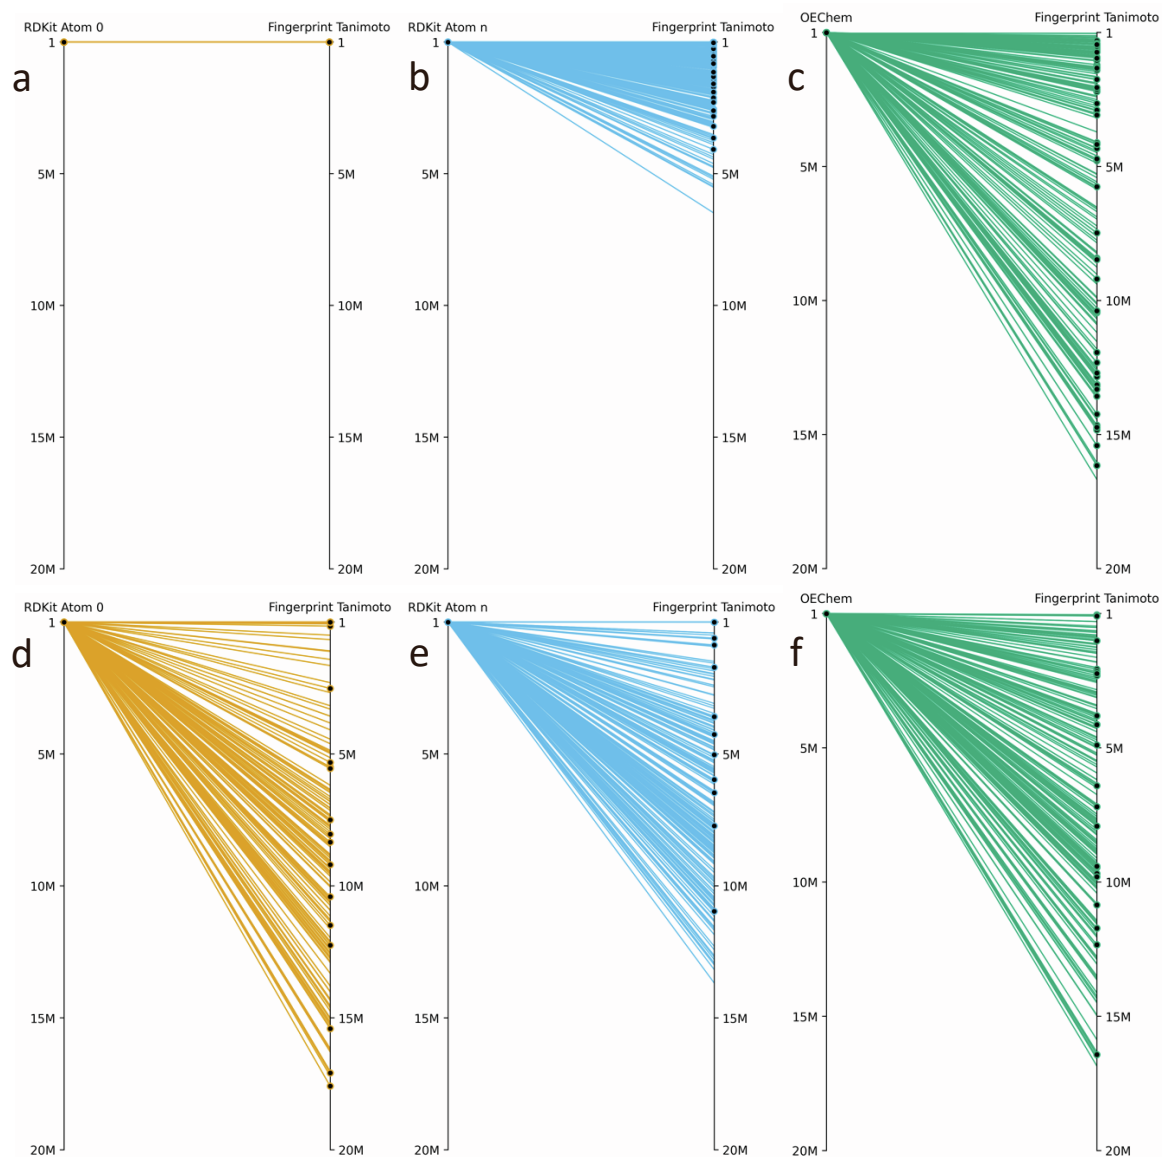

**Figure S6. The index rank of each canonicalization's top 250 results for BMS-536924 and 558441-90-0 compared to the index rank that these same molecules scored in a fingerprint Tanimoto search. Black dot indicates molecules functionally similar to the query, as determined by the GPT-assisted patent search. (a-c) BMS-536924. (d-f) 558441-90-0.**



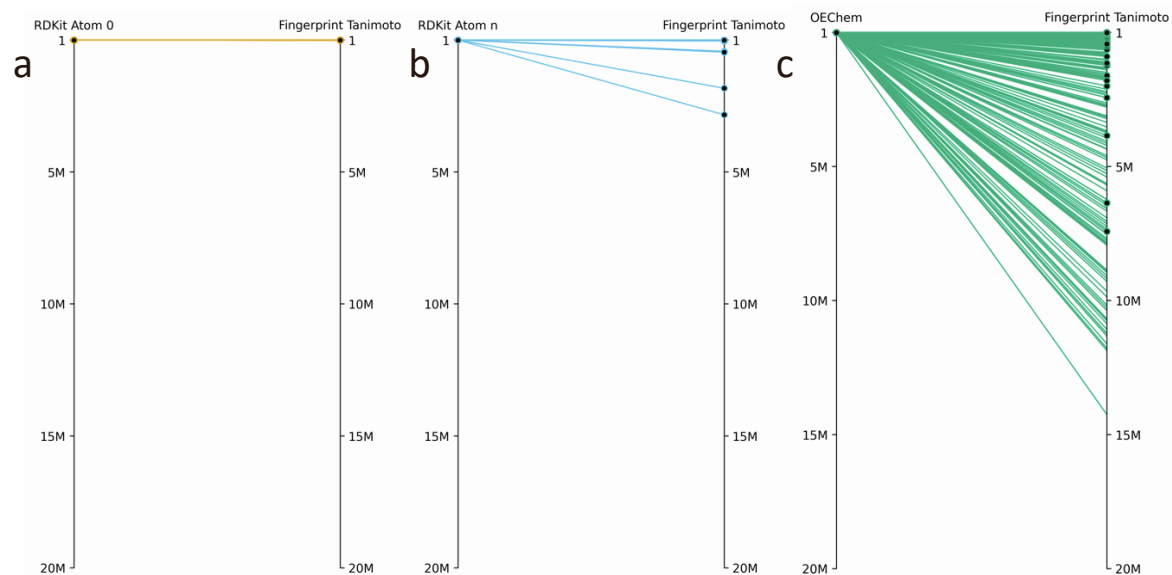

**Figure S7. The index rank of each canonicalization's top 250 results for fluticasone furoate compared to the index rank that these same molecules scored in a fingerprint Tanimoto search. Black dot indicates molecules functionally similar to the query, as determined by the GPT-assisted patent search. (a-c) Fluticasone furoate.**
